# Supplementary material for: Osthole Inhibits Expression of Genes Associated with Toll-like Receptor 2 Signaling Pathway in an Organotypic 3D Skin Model of Human Epidermis with Atopic Dermatitis
Source: MDPI journal article supplement (doi:10.3390/cells11010088), 2021-12-28
Supplement: s1 [file s1]

**Table S1.** Sequences of the oligonucleotide primers specific to examined genes.

| Gene             | Gene ID  | Sequence                                                               | Product length (bp) |
|------------------|----------|------------------------------------------------------------------------|---------------------|
| <i>YWHAZ</i>     | 7534     | F: 5'- TGTAGGAGCCCGTAGGTCATC -3'<br>R: 5'- GTGAAGCATTGGGGATCAAGA -3'   | 179                 |
| <i>TLR2</i>      | 7097     | F: 5'- AGTTTCCAACACCCCTCCTG -3'<br>R: 5'- CATTGTCCAGTGCTTCAACCTTT -3'  | 237                 |
| <i>NFκB</i>      | M58603.1 | F: 5'-TGGAGTCTGGGAAGGATTTG-3'<br>R: 5'-CGAAGCTGGACAAACACAGA-3'         | 129                 |
| <i>TIRAP/Mal</i> | 114609   | F: 5'-GCTGTCATGCGTTATCTGC-3'<br>R: 5'-CACATTTGTGGGAATCCGAGG-3'         | 118                 |
| <i>MyD88</i>     | 4615     | F: 5'- CCTTCATCTGCTATTGCCCCAG -3'<br>R: 5'- CCTTCTAGCCAACCTCTTTTCG -3' | 170                 |
| <i>IRAK</i>      | 3654     | F: 5'- CTACAAGAAGCACCTGGACCC -3'<br>R: 5'- TCTAGCCTCTCGTACACCTGGG -3'  | 138                 |
| <i>IκB-α</i>     | 4793     | F: 5'- CCTGGTGTCACTCCTGTTGA -3'<br>R: 5'- AGTCATCATAGGGCAGCTCGTC -3'   | 230                 |
| <i>TRAF6</i>     | 7189     | F: 5'- TGGCAGACTGTGACACTCAA -3'<br>R: 5'- TGACCCGAATTCCTGTGGG -3'      | 140                 |
